# Supplementary material for: Direct Inkjet Printing of Silver Source/Drain Electrodes on an Amorphous InGaZnO Layer for Thin-Film Transistors
Source: MDPI journal article supplement (doi:10.3390/ma10010051), 2017-01-10
Supplement: s1 [file s1]

# Supplementary Materials: Direct Inkjet Printing of Silver Source/Drain Electrodes on an Amorphous InGaZnO Layer for Thin-Film Transistors

Honglong Ning, Jianqiu Chen, Zhiqiang Fang, Ruiqiang Tao, Wei Cai, Rihui Yao, Shibin Hu, Zhennan Zhu, Yicong Zhou, Caigui Yang and Junbiao Peng

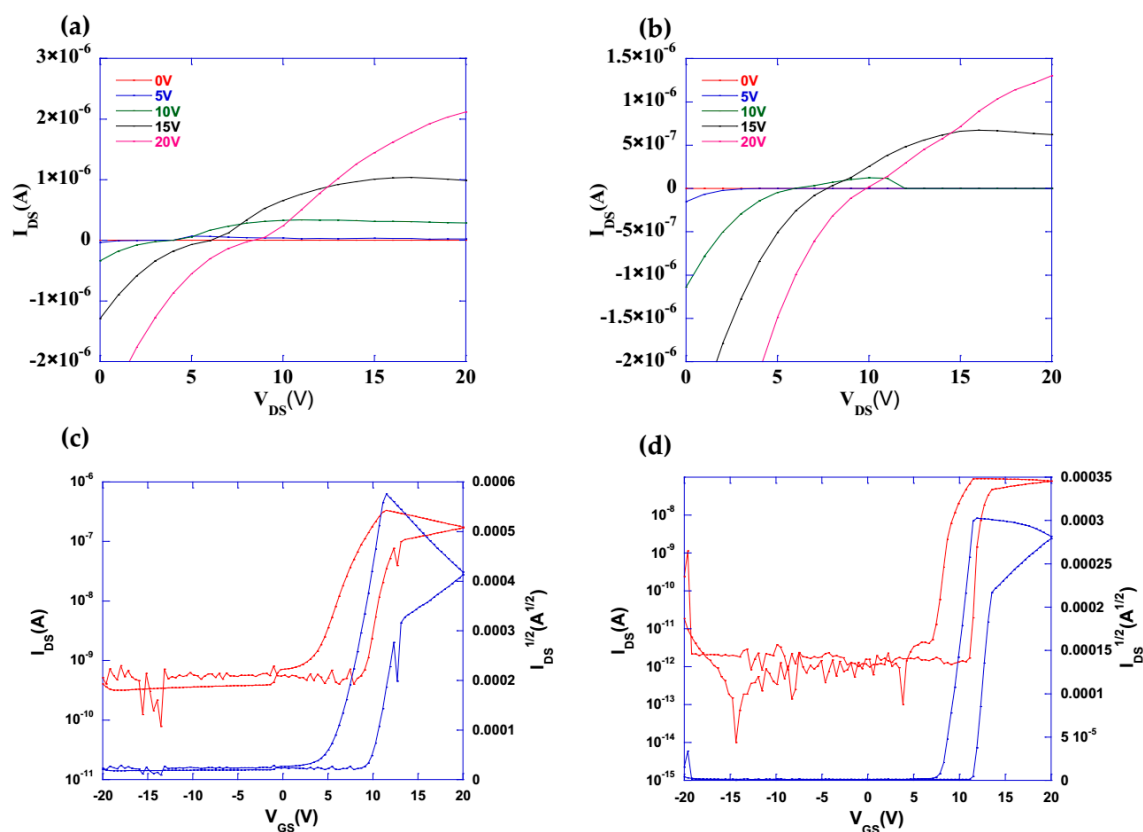

**Figure S1.** Output characteristic curves ( $I_{DS}$ – $V_{DS}$ ) and transfer characteristic curve ( $I_{DS}$ – $V_{GS}$ ) of manufactured a-IGZO TFTs at different printing substrate temperatures. (a) 40 °C; (b) 50 °C; (c) 40 °C; (d) 50 °C.  $V_{GS}$  is varied from 20 to –20 V with  $V_{DS} = 10.1$  V.

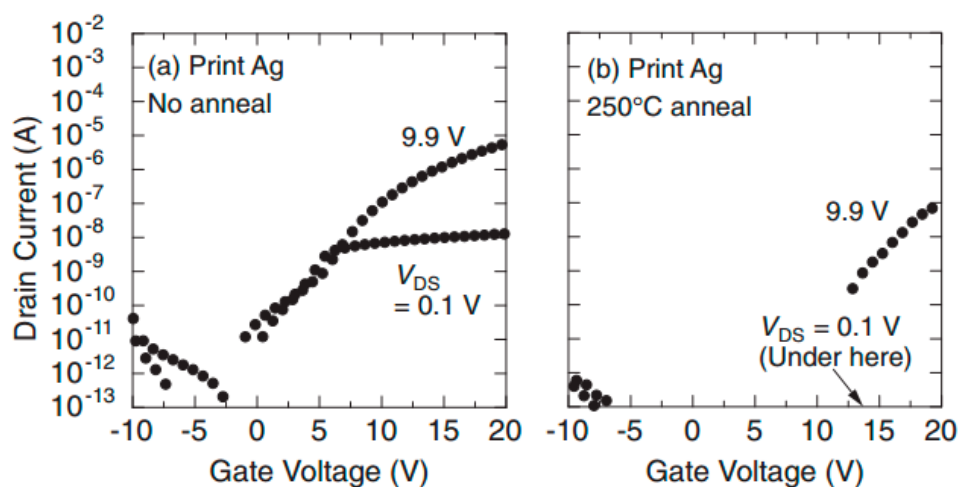

**Figure S2.** Transfer characteristic curve ( $I_{DS}$ – $V_{GS}$ ) of devices Yoshihiro et al. had reported.

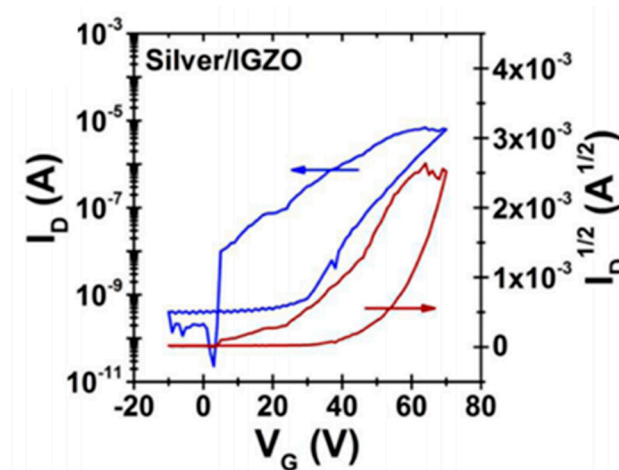

**Figure S3.** Transfer characteristic curve ( $I_{DS}$ - $V_{GS}$ ) of devices Ethan et al. had reported.
